# Supplementary material for: Multibody Model with Foot-Deformation Approach for Estimating Ground Reaction Forces and Moments and Joint Torques during Level Walking through Optical Motion Capture without Optimization Techniques
Source: MDPI journal article supplement (doi:10.3390/s24092792), 2024-04-27
Supplement: s1 [file s1]

**Table S1.** Pearson’s correlation coefficients ( $\rho$ ), root mean square error (RMSE) and relative RMSE (rRMSE) of ground reaction forces (GRFs), moments (GRMs), and joint torques during normal-speed, fast-speed (approximately +20 % of the normal-speed), and slow-speed (approximately -20 % of the normal-speed). The average and standard deviation (SD) for all participants are displayed, with magnitudes normalized to body mass of participants.

| Gait speed | Normal           |                                  |                      | Fast<br>(+20 %)  |                                  |                      | Slow<br>(-20 %)  |                                  |                      |
|------------|------------------|----------------------------------|----------------------|------------------|----------------------------------|----------------------|------------------|----------------------------------|----------------------|
|            | $\rho$ (SD)      | RMSE (SD)<br>[N/kg or<br>N·m/kg] | rRMSE<br>(SD)<br>[%] | $\rho$ (SD)      | RMSE (SD)<br>[N/kg or<br>N·m/kg] | rRMSE<br>(SD)<br>[%] | $\rho$ (SD)      | RMSE (SD)<br>[N/kg or<br>N·m/kg] | rRMSE<br>(SD)<br>[%] |
| GRF        |                  |                                  |                      |                  |                                  |                      |                  |                                  |                      |
| Anterior   | 0.901<br>(0.087) | 0.427<br>(0.135)                 | 11.4<br>(3.9)        | 0.888<br>(0.120) | 0.551<br>(0.180)                 | 12.6<br>(5.0)        | 0.910<br>(0.062) | 0.356<br>(0.107)                 | 10.6<br>(3.4)        |
| Medial     | 0.813<br>(0.092) | 0.164<br>(0.029)                 | 17.0<br>(3.6)        | 0.776<br>(0.159) | 0.183<br>(0.034)                 | 17.6<br>(3.9)        | 0.748<br>(0.160) | 0.161<br>(0.027)                 | 18.4<br>(3.6)        |
| Vertical   | 0.945<br>(0.068) | 1.422<br>(0.678)                 | 11.6<br>(5.4)        | 0.931<br>(0.105) | 1.614<br>(0.794)                 | 12.2<br>(6.0)        | 0.953<br>(0.062) | 1.258<br>(0.678)                 | 10.9<br>(6.2)        |
| GRM        |                  |                                  |                      |                  |                                  |                      |                  |                                  |                      |
| Frontal    | 0.796<br>(0.154) | 0.066<br>(0.028)                 | 19.5<br>(7.1)        | 0.753<br>(0.169) | 0.098<br>(0.056)                 | 23.3<br>(10.9)       | 0.790<br>(0.164) | 0.078<br>(0.049)                 | 21.7<br>(13.2)       |
| Sagittal   | 0.906<br>(0.131) | 0.211<br>(0.080)                 | 13.9<br>(7.9)        | 0.910<br>(0.141) | 0.210<br>(0.088)                 | 12.5<br>(7.4)        | 0.856<br>(0.311) | 0.257<br>(0.336)                 | 14.9<br>(13.6)       |
| Transverse | 0.854<br>(0.144) | 0.018<br>(0.007)                 | 13.5<br>(5.4)        | 0.823<br>(0.200) | 0.023<br>(0.009)                 | 15.0<br>(6.4)        | 0.783<br>(0.316) | 0.020<br>(0.018)                 | 13.9<br>(7.9)        |
| Hip        |                  |                                  |                      |                  |                                  |                      |                  |                                  |                      |
| Frontal    | 0.897<br>(0.056) | 0.168<br>(0.046)                 | 14.5<br>(3.4)        | 0.866<br>(0.077) | 0.202<br>(0.065)                 | 15.7<br>(4.2)        | 0.914<br>(0.063) | 0.158<br>(0.042)                 | 13.9<br>(4.0)        |
| Transverse | 0.915<br>(0.038) | 0.032<br>(0.007)                 | 11.3<br>(2.6)        | 0.875<br>(0.133) | 0.046<br>(0.019)                 | 13.0<br>(7.1)        | 0.902<br>(0.052) | 0.032<br>(0.008)                 | 12.6<br>(3.2)        |
| Sagittal   | 0.798<br>(0.076) | 0.307<br>(0.095)                 | 15.0<br>(2.5)        | 0.825<br>(0.082) | 0.416<br>(0.157)                 | 15.1<br>(4.1)        | 0.814<br>(0.068) | 0.219<br>(0.055)                 | 15.0<br>(2.7)        |
| Knee       |                  |                                  |                      |                  |                                  |                      |                  |                                  |                      |
| Frontal    | 0.878<br>(0.091) | 0.054<br>(0.023)                 | 16.3<br>(6.4)        | 0.839<br>(0.121) | 0.076<br>(0.047)                 | 19.3<br>(7.4)        | 0.876<br>(0.071) | 0.059<br>(0.021)                 | 18.8<br>(5.7)        |
| Transverse | 0.860<br>(0.120) | 0.040<br>(0.016)                 | 18.4<br>(7.0)        | 0.817<br>(0.209) | 0.060<br>(0.048)                 | 20.5<br>(9.4)        | 0.870<br>(0.123) | 0.040<br>(0.019)                 | 18.6<br>(7.2)        |
| Sagittal   | 0.759<br>(0.084) | 0.187<br>(0.053)                 | 18.3<br>(3.7)        | 0.802<br>(0.083) | 0.215<br>(0.047)                 | 16.3<br>(3.5)        | 0.760<br>(0.148) | 0.160<br>(0.044)                 | 17.9<br>(5.9)        |
| Ankle      |                  |                                  |                      |                  |                                  |                      |                  |                                  |                      |
| Frontal    | 0.750<br>(0.245) | 0.039<br>(0.016)                 | 22.1<br>(7.2)        | 0.725<br>(0.214) | 0.057<br>(0.040)                 | 24.0<br>(9.3)        | 0.809<br>(0.121) | 0.042<br>(0.018)                 | 23.0<br>(7.1)        |
| Transverse | 0.855<br>(0.135) | 0.053<br>(0.024)                 | 17.9<br>(6.9)        | 0.814<br>(0.206) | 0.078<br>(0.056)                 | 21.0<br>(10.4)       | 0.873<br>(0.122) | 0.056<br>(0.025)                 | 18.5<br>(7.4)        |
| Sagittal   | 0.938<br>(0.123) | 0.186<br>(0.096)                 | 10.8<br>(8.5)        | 0.941<br>(0.137) | 0.177<br>(0.115)                 | 9.5<br>(9.3)         | 0.941<br>(0.104) | 0.170<br>(0.090)                 | 10.4<br>(8.8)        |
